# Supplementary material for: The impact of heat-set milk protein gel textures modified by pH on circulating amino acid appearance and gastric function in healthy female adults: a randomised controlled trial
Source: Royal Society of Chemistry journal article supplement (doi:10.1039/d3fo04474b), 2024-01-01
Supplement: d3fo04474b1.pdf [file d3fo04474b1.pdf]

**1 Supplemental Files**

**2 The impact of heat-set milk protein gel textures modified by pH on circulating**  
**3 amino acid appearance and gastric function in healthy female adults: a**  
**4 randomised controlled trial**

5 Amber M. Milan, Giselle G.A. Menting, Matthew P.G. Barnett, Yutong Liu, Warren C.  
6 McNabb, Nicole C. Roy, Scott C. Hutchings, Tanyaradzwa Mungure, Mike Weeks, Siqui  
7 Li, Joanne Hort, Stefan Calder, Greg O'Grady, and Richard F. Mithen

8 Supplemental Table 1: Appeal and sensory evaluation by visual analogue scale  
 9 following firm bovine dairy gel (FIRM-G) and soft bovine dairy gel (SOFT-G) ingestion.

|                                 | FIRM-G <sup>1</sup> | SOFT-G | P value <sup>2</sup> |
|---------------------------------|---------------------|--------|----------------------|
| Appeal <sup>3</sup>             |                     |        |                      |
| Overall liking                  | 46 ± 6              | 44 ± 6 | 0.664                |
| Aftertaste                      | 55 ± 5              | 53 ± 5 | 0.480                |
| Mouthfeel                       | 48 ± 6              | 56 ± 5 | 0.224                |
| Palatability                    | 43 ± 5              | 40 ± 5 | 0.480                |
| Smell                           | 67 ± 4              | 66 ± 5 | 0.839                |
| Taste                           | 40 ± 5              | 43 ± 6 | 0.553                |
| Visual                          | 49 ± 5              | 49 ± 6 | 0.955                |
| Sensory evaluation <sup>4</sup> |                     |        |                      |
| Bitterness                      | 16 ± 5              | 21 ± 7 | 0.442                |
| Fattiness                       | 34 ± 5              | 37 ± 6 | 0.212                |
| Flavour intensity               | 35 ± 5              | 29 ± 5 | 0.386                |
| 'Melt in the mouth'             | 47 ± 6              | 51 ± 5 | 0.562                |
| Mouth-drying                    | 37 ± 6              | 43 ± 6 | 0.264                |
| Saltiness                       | 21 ± 4              | 19 ± 4 | 0.748                |
| Savouriness                     | 32 ± 5              | 29 ± 5 | 0.519                |
| Smoothness                      | 60 ± 4              | 72 ± 4 | 0.043                |
| Sourness                        | 15 ± 4              | 11 ± 3 | 0.425                |
| Sweetness                       | 23 ± 4              | 22 ± 4 | 0.425                |
| Thickness                       | 70 ± 3              | 59 ± 5 | 0.017                |

10 <sup>1</sup> Values presented as mean ± SEM (mm).

11 <sup>2</sup> Interactions were analysed by general linear model with Sidak corrected post hoc  
 12 analysis.

13 <sup>3</sup> Scores for appeal: 0 mm = 'bad / disliked', and 100 mm = 'good / liked'.

14 <sup>4</sup> Scores for sensory evaluation: 0 mm = 'not at all', and 100 mm = 'extremely'.

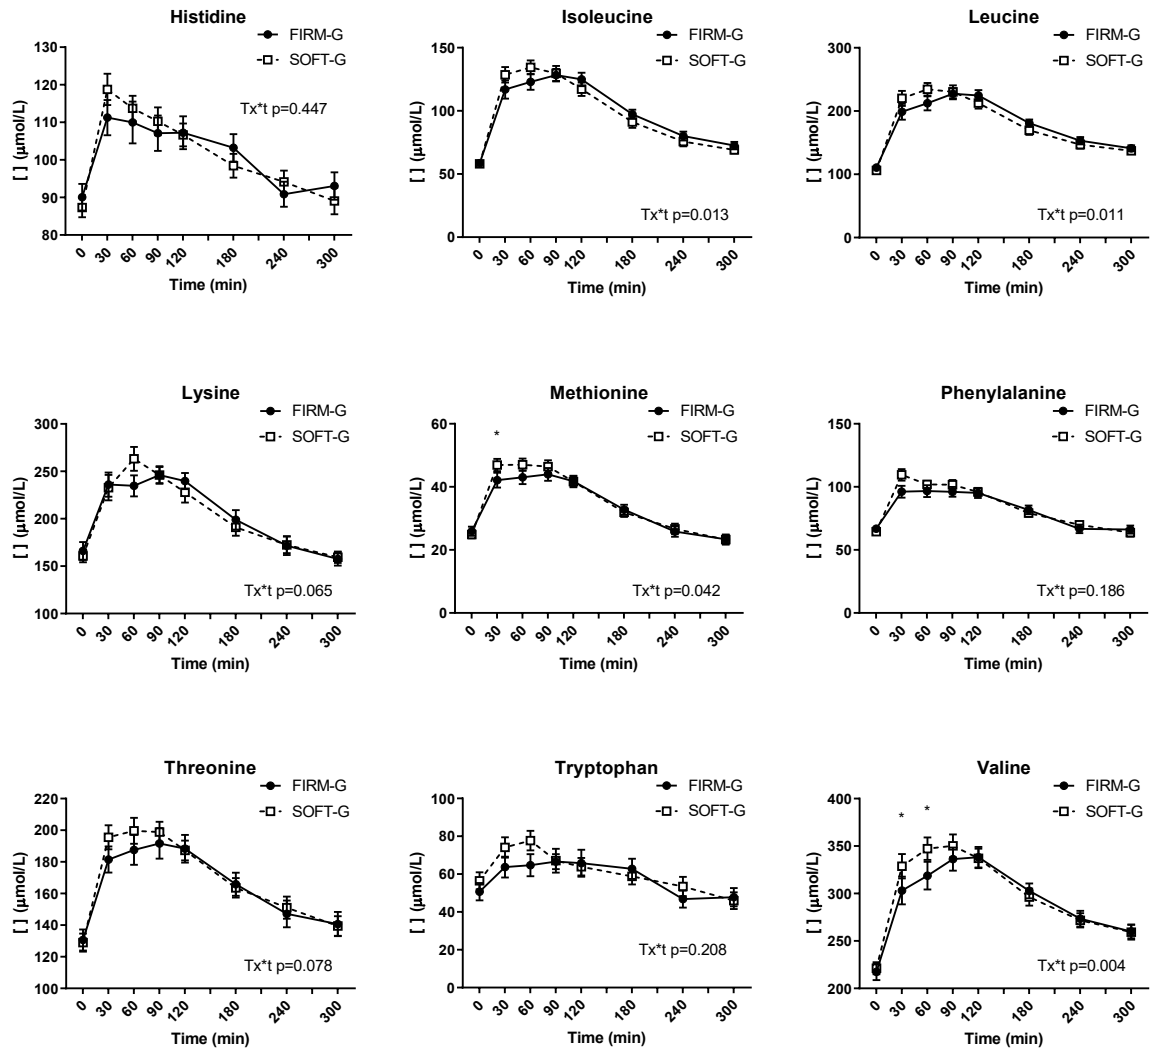

15  
16

17 Supplemental Figure 1: Plasma indispensable amino acid concentrations for firm  
 18 bovine dairy gel (FIRM-G; black) and soft bovine dairy gel (SOFT-G; white). Data are  
 19 presented as mean  $\pm$  SEM in  $\mu\text{mol/L}$  (n=20).

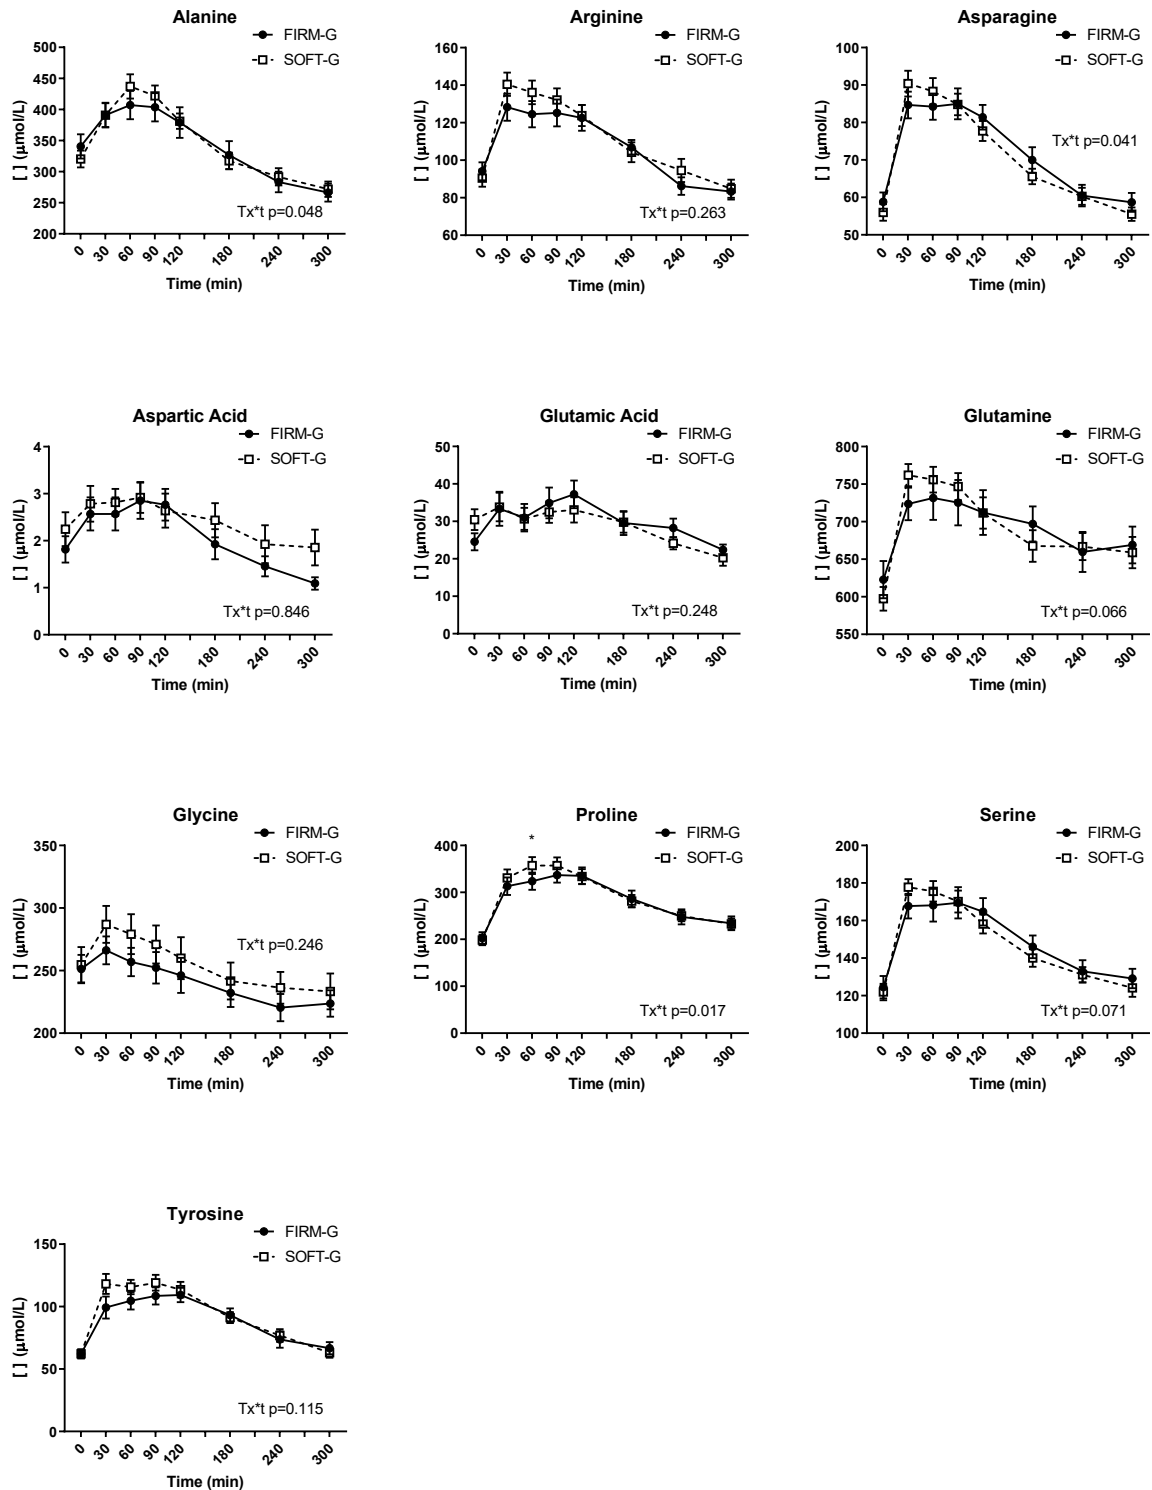

20  
21

22 Supplemental Figure 2: Plasma dispensable amino acid concentrations for firm bovine  
 23 dairy gel (FIRM-G; black) and soft bovine dairy gel (SOFT-G; white). Data are  
 24 presented as mean  $\pm$  SEM in  $\mu\text{mol/L}$  (n=20).

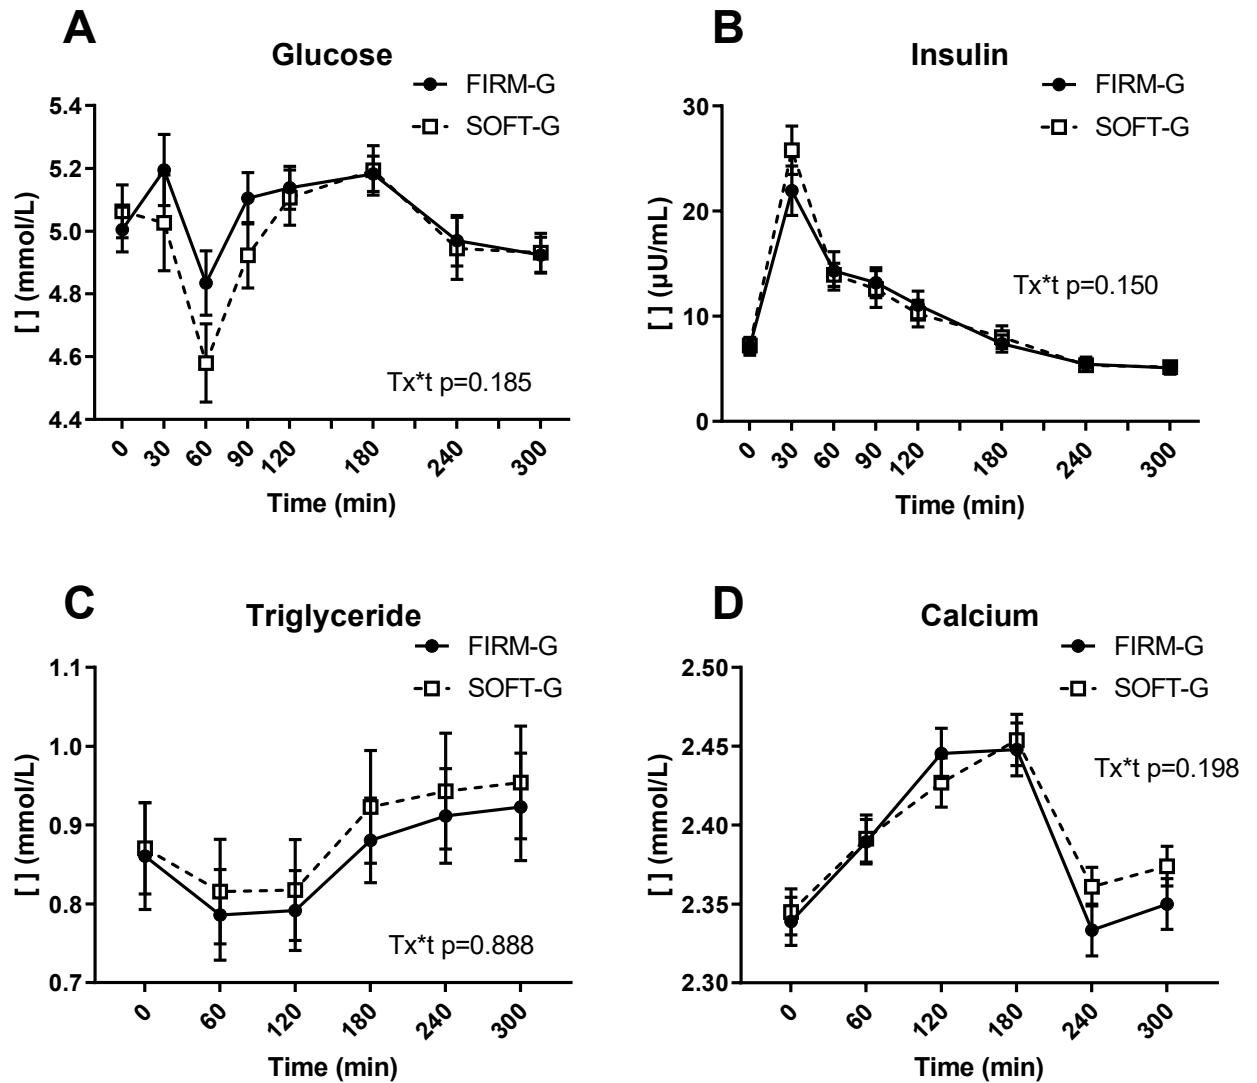

25  
26

27 Supplemental Figure 3: Postprandial clinical biochemistry for firm bovine dairy gel  
 28 (FIRM-G; black) and soft bovine dairy gel (SOFT-G; white) of plasma (A) glucose, (B)  
 29 insulin, (C) triglycerides, and (D) serum calcium. Data are presented as mean  $\pm$  SEM  
 30 (n=20).

31 Supplemental Table 2: Digestive symptom, appetite, and desire for specific food types  
 32 scores by visual analogue scale following firm bovine dairy gel (FIRM-G) and soft  
 33 bovine dairy gel (SOFT-G) ingestion.

| Attribute                     | Time (min) | FIRM-G <sup>1</sup> |   |   | SOFT-G |   |   | p value <sup>2</sup> |
|-------------------------------|------------|---------------------|---|---|--------|---|---|----------------------|
| Abdominal cramps <sup>3</sup> | 0          | 3                   | ± | 1 | 12     | ± | 6 | 0.502                |
|                               | 1          | 4                   | ± | 2 | 3      | ± | 1 |                      |
|                               | 5          | 3                   | ± | 1 | 5      | ± | 3 |                      |
|                               | 30         | 3                   | ± | 2 | 2      | ± | 1 |                      |
|                               | 60         | 3                   | ± | 1 | 3      | ± | 2 |                      |
|                               | 90         | 4                   | ± | 2 | 2      | ± | 1 |                      |
|                               | 120        | 2                   | ± | 1 | 4      | ± | 2 |                      |
|                               | 180        | 6                   | ± | 4 | 7      | ± | 4 |                      |
|                               | 240        | 2                   | ± | 2 | 5      | ± | 2 |                      |
|                               | 300        | 6                   | ± | 4 | 4      | ± | 2 |                      |
| Abdominal distension          | 0          | 7                   | ± | 4 | 8      | ± | 4 | 0.728                |
|                               | 1          | 7                   | ± | 3 | 5      | ± | 3 |                      |
|                               | 5          | 8                   | ± | 3 | 5      | ± | 2 |                      |
|                               | 30         | 9                   | ± | 4 | 5      | ± | 3 |                      |
|                               | 60         | 8                   | ± | 3 | 6      | ± | 4 |                      |
|                               | 90         | 4                   | ± | 2 | 6      | ± | 4 |                      |
|                               | 120        | 9                   | ± | 4 | 6      | ± | 3 |                      |
|                               | 180        | 5                   | ± | 2 | 6      | ± | 4 |                      |
|                               | 240        | 5                   | ± | 2 | 6      | ± | 4 |                      |
|                               | 300        | 7                   | ± | 3 | 7      | ± | 4 |                      |
| Abdominal rumbling            | 0          | 17                  | ± | 6 | 10     | ± | 4 | 0.219                |
|                               | 1          | 15                  | ± | 5 | 10     | ± | 5 |                      |
|                               | 5          | 17                  | ± | 5 | 15     | ± | 5 |                      |
|                               | 30         | 16                  | ± | 5 | 14     | ± | 5 |                      |
|                               | 60         | 18                  | ± | 5 | 18     | ± | 6 |                      |
|                               | 90         | 18                  | ± | 5 | 18     | ± | 6 |                      |
|                               | 120        | 14                  | ± | 5 | 18     | ± | 5 |                      |
|                               | 180        | 28                  | ± | 7 | 20     | ± | 6 |                      |
|                               | 240        | 28                  | ± | 7 | 16     | ± | 5 |                      |
|                               | 300        | 19                  | ± | 6 | 15     | ± | 5 |                      |
| Belching                      | 0          | 7                   | ± | 4 | 5      | ± | 3 | 0.931                |
|                               | 1          | 4                   | ± | 2 | 8      | ± | 5 |                      |
|                               | 5          | 12                  | ± | 5 | 15     | ± | 5 |                      |
|                               | 30         | 9                   | ± | 5 | 13     | ± | 5 |                      |
|                               | 60         | 9                   | ± | 5 | 10     | ± | 5 |                      |
|                               | 90         | 11                  | ± | 5 | 10     | ± | 5 |                      |
|                               | 120        | 8                   | ± | 4 | 7      | ± | 4 |                      |
|                               | 180        | 9                   | ± | 4 | 10     | ± | 5 |                      |
|                               | 240        | 9                   | ± | 4 | 6      | ± | 4 |                      |

|                |     |      |   |      |   |       |
|----------------|-----|------|---|------|---|-------|
| Bloating       | 300 | 9 ±  | 5 | 4 ±  | 3 | 0.659 |
|                | 0   | 11 ± | 5 | 6 ±  | 3 |       |
|                | 1   | 9 ±  | 3 | 5 ±  | 2 |       |
|                | 5   | 9 ±  | 4 | 8 ±  | 4 |       |
|                | 30  | 12 ± | 4 | 7 ±  | 3 |       |
|                | 60  | 13 ± | 5 | 12 ± | 4 |       |
|                | 90  | 11 ± | 3 | 11 ± | 4 |       |
|                | 120 | 11 ± | 4 | 13 ± | 5 |       |
|                | 180 | 9 ±  | 3 | 8 ±  | 4 |       |
|                | 240 | 6 ±  | 2 | 9 ±  | 4 |       |
| Diarrhoea      | 300 | 7 ±  | 2 | 6 ±  | 3 | 0.519 |
|                | 0   | 2 ±  | 1 | 1 ±  | 1 |       |
|                | 1   | 2 ±  | 1 | 1 ±  | 0 |       |
|                | 5   | 2 ±  | 1 | 0 ±  | 0 |       |
|                | 30  | 2 ±  | 1 | 1 ±  | 1 |       |
|                | 60  | 1 ±  | 1 | 1 ±  | 1 |       |
|                | 90  | 2 ±  | 1 | 2 ±  | 1 |       |
|                | 120 | 1 ±  | 1 | 4 ±  | 3 |       |
|                | 180 | 6 ±  | 5 | 1 ±  | 0 |       |
|                | 240 | 1 ±  | 1 | 1 ±  | 0 |       |
| Faecal urgency | 300 | 2 ±  | 1 | 4 ±  | 3 | 0.071 |
|                | 0   | 3 ±  | 2 | 8 ±  | 1 |       |
|                | 1   | 3 ±  | 2 | 7 ±  | 5 |       |
|                | 5   | 5 ±  | 3 | 4 ±  | 4 |       |
|                | 30  | 5 ±  | 3 | 8 ±  | 3 |       |
|                | 60  | 4 ±  | 3 | 8 ±  | 4 |       |
|                | 90  | 4 ±  | 2 | 11 ± | 4 |       |
|                | 120 | 3 ±  | 2 | 8 ±  | 5 |       |
|                | 180 | 4 ±  | 3 | 8 ±  | 4 |       |
|                | 240 | 5 ±  | 3 | 4 ±  | 4 |       |
| Flatulence     | 300 | 4 ±  | 3 | 4 ±  | 3 | 0.939 |
|                | 0   | 3 ±  | 1 | 3 ±  | 2 |       |
|                | 1   | 4 ±  | 2 | 4 ±  | 2 |       |
|                | 5   | 10 ± | 5 | 4 ±  | 4 |       |
|                | 30  | 11 ± | 5 | 13 ± | 6 |       |
|                | 60  | 10 ± | 5 | 10 ± | 5 |       |
|                | 90  | 9 ±  | 5 | 10 ± | 5 |       |
|                | 120 | 7 ±  | 4 | 9 ±  | 3 |       |
|                | 180 | 7 ±  | 4 | 8 ±  | 4 |       |
|                | 240 | 8 ±  | 4 | 6 ±  | 3 |       |
| Gastric reflux | 300 | 8 ±  | 5 | 7 ±  | 4 | 0.495 |
|                | 0   | 9 ±  | 5 | 5 ±  | 4 |       |
|                | 1   | 7 ±  | 4 | 5 ±  | 4 |       |
|                | 5   | 7 ±  | 4 | 4 ±  | 2 |       |
|                | 30  | 8 ±  | 4 | 5 ±  | 4 |       |
|                | 60  | 6 ±  | 4 | 5 ±  | 3 |       |

|                                         |     |      |   |      |   |       |
|-----------------------------------------|-----|------|---|------|---|-------|
|                                         | 90  | 5 ±  | 3 | 4 ±  | 3 |       |
|                                         | 120 | 6 ±  | 4 | 5 ±  | 3 |       |
|                                         | 180 | 7 ±  | 5 | 5 ±  | 3 |       |
|                                         | 240 | 7 ±  | 4 | 5 ±  | 3 |       |
|                                         | 300 | 8 ±  | 4 | 5 ±  | 4 |       |
| Nausea                                  | 0   | 8 ±  | 4 | 6 ±  | 3 | 0.261 |
|                                         | 1   | 9 ±  | 4 | 10 ± | 5 |       |
|                                         | 5   | 12 ± | 5 | 2 ±  | 1 |       |
|                                         | 30  | 10 ± | 5 | 2 ±  | 1 |       |
|                                         | 60  | 6 ±  | 3 | 2 ±  | 1 |       |
|                                         | 90  | 6 ±  | 3 | 3 ±  | 1 |       |
|                                         | 120 | 8 ±  | 4 | 4 ±  | 1 |       |
|                                         | 180 | 7 ±  | 4 | 3 ±  | 1 |       |
|                                         | 240 | 9 ±  | 4 | 7 ±  | 4 |       |
|                                         | 300 | 3 ±  | 1 | 3 ±  | 1 |       |
| Vomiting                                | 0   | 5 ±  | 4 | 6 ±  | 5 | 0.901 |
|                                         | 1   | 2 ±  | 1 | 5 ±  | 4 |       |
|                                         | 5   | 2 ±  | 1 | 1 ±  | 1 |       |
|                                         | 30  | 2 ±  | 1 | 4 ±  | 2 |       |
|                                         | 60  | 4 ±  | 3 | 1 ±  | 1 |       |
|                                         | 90  | 2 ±  | 1 | 4 ±  | 3 |       |
|                                         | 120 | 4 ±  | 3 | 1 ±  | 0 |       |
|                                         | 180 | 1 ±  | 1 | 1 ±  | 1 |       |
|                                         | 240 | 1 ±  | 1 | 1 ±  | 0 |       |
|                                         | 300 | 2 ±  | 1 | 4 ±  | 3 |       |
| Digestive comfort                       | 0   | 62 ± | 7 | 54 ± | 7 | 0.151 |
|                                         | 1   | 73 ± | 6 | 67 ± | 6 |       |
|                                         | 5   | 69 ± | 4 | 65 ± | 5 |       |
|                                         | 30  | 66 ± | 4 | 61 ± | 5 |       |
|                                         | 60  | 65 ± | 5 | 60 ± | 6 |       |
|                                         | 90  | 66 ± | 5 | 65 ± | 5 |       |
|                                         | 120 | 66 ± | 5 | 62 ± | 6 |       |
|                                         | 180 | 62 ± | 5 | 60 ± | 7 |       |
|                                         | 240 | 60 ± | 6 | 61 ± | 7 |       |
|                                         | 300 | 67 ± | 6 | 63 ± | 6 |       |
| How satisfied do you feel? <sup>4</sup> | 0   | 29 ± | 5 | 29 ± | 6 | 0.265 |
|                                         | 1   | 23 ± | 4 | 28 ± | 6 |       |
|                                         | 5   | 53 ± | 5 | 61 ± | 5 |       |
|                                         | 30  | 42 ± | 4 | 54 ± | 5 |       |
|                                         | 60  | 39 ± | 4 | 37 ± | 5 |       |
|                                         | 90  | 44 ± | 4 | 44 ± | 6 |       |
|                                         | 120 | 36 ± | 4 | 34 ± | 5 |       |
|                                         | 180 | 27 ± | 3 | 31 ± | 5 |       |
|                                         | 240 | 21 ± | 3 | 24 ± | 4 |       |
|                                         | 300 | 19 ± | 3 | 21 ± | 4 |       |
| How full do you feel?                   | 0   | 33 ± | 6 | 30 ± | 6 | 0.598 |



|                                            |     |      |   |      |   |       |
|--------------------------------------------|-----|------|---|------|---|-------|
|                                            | 1   | 33 ± | 6 | 27 ± | 5 |       |
|                                            | 5   | 54 ± | 5 | 58 ± | 5 |       |
|                                            | 30  | 44 ± | 4 | 50 ± | 5 |       |
|                                            | 60  | 42 ± | 4 | 49 ± | 6 |       |
|                                            | 90  | 44 ± | 4 | 43 ± | 7 |       |
|                                            | 120 | 36 ± | 4 | 34 ± | 6 |       |
|                                            | 180 | 24 ± | 3 | 32 ± | 5 |       |
|                                            | 240 | 21 ± | 3 | 23 ± | 4 |       |
|                                            | 300 | 18 ± | 3 | 17 ± | 3 |       |
| How hungry do you feel?                    | 0   | 54 ± | 6 | 52 ± | 6 | 0.056 |
|                                            | 1   | 58 ± | 7 | 51 ± | 7 |       |
|                                            | 5   | 35 ± | 6 | 33 ± | 6 |       |
|                                            | 30  | 48 ± | 5 | 44 ± | 6 |       |
|                                            | 60  | 57 ± | 4 | 48 ± | 7 |       |
|                                            | 90  | 56 ± | 4 | 39 ± | 6 |       |
|                                            | 120 | 62 ± | 4 | 54 ± | 6 |       |
|                                            | 180 | 71 ± | 4 | 66 ± | 5 |       |
|                                            | 240 | 70 ± | 4 | 72 ± | 4 |       |
|                                            | 300 | 79 ± | 3 | 69 ± | 5 |       |
| How much do you think you can eat?         | 0   | 65 ± | 4 | 61 ± | 6 | 0.691 |
|                                            | 1   | 62 ± | 5 | 64 ± | 5 |       |
|                                            | 5   | 52 ± | 5 | 53 ± | 5 |       |
|                                            | 30  | 60 ± | 4 | 55 ± | 5 |       |
|                                            | 60  | 60 ± | 3 | 60 ± | 5 |       |
|                                            | 90  | 59 ± | 4 | 57 ± | 5 |       |
|                                            | 120 | 64 ± | 4 | 65 ± | 5 |       |
|                                            | 180 | 74 ± | 3 | 70 ± | 4 |       |
|                                            | 240 | 73 ± | 5 | 75 ± | 3 |       |
|                                            | 300 | 82 ± | 3 | 79 ± | 3 |       |
| Desire to eat something fatty <sup>5</sup> | 0   | 60 ± | 6 | 60 ± | 6 | 0.640 |
|                                            | 1   | 57 ± | 6 | 60 ± | 6 |       |
|                                            | 5   | 63 ± | 6 | 68 ± | 7 |       |
|                                            | 30  | 57 ± | 7 | 64 ± | 6 |       |
|                                            | 60  | 63 ± | 7 | 62 ± | 7 |       |
|                                            | 90  | 57 ± | 7 | 61 ± | 7 |       |
|                                            | 120 | 56 ± | 6 | 65 ± | 7 |       |
|                                            | 180 | 50 ± | 7 | 57 ± | 7 |       |
|                                            | 240 | 51 ± | 7 | 51 ± | 7 |       |
|                                            | 300 | 45 ± | 7 | 40 ± | 7 |       |
| Desire to eat something salty              | 0   | 51 ± | 7 | 58 ± | 5 | 0.242 |
|                                            | 1   | 46 ± | 6 | 55 ± | 6 |       |
|                                            | 5   | 55 ± | 7 | 58 ± | 6 |       |
|                                            | 30  | 47 ± | 6 | 53 ± | 5 |       |
|                                            | 60  | 47 ± | 5 | 56 ± | 6 |       |
|                                            | 90  | 46 ± | 5 | 54 ± | 6 |       |
|                                            | 120 | 44 ± | 5 | 55 ± | 6 |       |

|                               |     |      |   |      |   |       |
|-------------------------------|-----|------|---|------|---|-------|
|                               | 180 | 40 ± | 5 | 50 ± | 6 |       |
|                               | 240 | 38 ± | 4 | 40 ± | 6 |       |
|                               | 300 | 30 ± | 4 | 34 ± | 6 |       |
| Thoughts of food: savoury     | 0   | 38 ± | 7 | 43 ± | 6 | 0.111 |
|                               | 1   | 36 ± | 6 | 39 ± | 5 |       |
|                               | 5   | 36 ± | 4 | 50 ± | 7 |       |
|                               | 30  | 39 ± | 5 | 45 ± | 5 |       |
|                               | 60  | 37 ± | 4 | 44 ± | 6 |       |
|                               | 90  | 35 ± | 4 | 42 ± | 6 |       |
|                               | 120 | 34 ± | 5 | 40 ± | 6 |       |
|                               | 180 | 22 ± | 3 | 37 ± | 6 |       |
|                               | 240 | 25 ± | 5 | 32 ± | 7 |       |
|                               | 300 | 18 ± | 3 | 27 ± | 7 |       |
| Desire to eat something sweet | 0   | 49 ± | 6 | 55 ± | 7 | 0.411 |
|                               | 1   | 47 ± | 6 | 51 ± | 6 |       |
|                               | 5   | 49 ± | 8 | 51 ± | 7 |       |
|                               | 30  | 51 ± | 6 | 49 ± | 5 |       |
|                               | 60  | 52 ± | 7 | 51 ± | 6 |       |
|                               | 90  | 48 ± | 6 | 50 ± | 7 |       |
|                               | 120 | 48 ± | 7 | 53 ± | 6 |       |
|                               | 180 | 42 ± | 6 | 47 ± | 6 |       |
|                               | 240 | 40 ± | 6 | 45 ± | 7 |       |
|                               | 300 | 38 ± | 6 | 44 ± | 6 |       |

34 <sup>1</sup> Values presented as mean ± SEM (mm).

35 <sup>2</sup> Interactions were analysed by general linear model with Sidak corrected post hocs.

36 <sup>3</sup> Scores for digestive symptoms: 0 mm = 'no symptom', and 100 mm = 'the most  
37 severe symptom imaginable'; digestive comfort scale: 0 = 'extremely comfortable'; 100  
38 = 'extremely uncomfortable'.

39 <sup>4</sup> Satisfied: 0 mm = 'yes very much', and 100 mm = 'no not at all'; Full: 0 mm = 'I am  
40 completely empty', and 100 mm = 'I cannot eat another bite'; Hungry: 0 mm = 'I am  
41 not hungry at all', and 100 mm = 'I have never been more hungry'; How much do you  
42 think you can eat: 0 mm = 'nothing at all', and 100 mm = 'a lot'.

43 <sup>5</sup> Desire for specific food types: 0 mm = 'yes very much', and 100 mm = 'no not at all'.  
44

45 Supplemental Table 3: Body surface gastric mapping derived parameters of  
 46 amplitude, Gastric Alimetry Rhythm Index and Principle Gastric Frequency  
 47 incremental area under the curve (AUC), maximum concentration ( $C_{max}$ ) and time to  
 48 maximum concentration ( $T_{max}$ ) over 5 h following firm bovine dairy gel (FIRM-G) and  
 49 soft bovine dairy gel (SOFT-G) ingestion.

| Measure   |                                    | FIRM-G |       |      | SOFT-G |       |      | P value |
|-----------|------------------------------------|--------|-------|------|--------|-------|------|---------|
| AUC       | BMI-Adjusted Amplitude ( $\mu V$ ) | -15.3  | $\pm$ | 10.1 | -26.7  | $\pm$ | 15.7 | 0.395   |
|           | Gastric Alimetry Rhythm Index      | 0.68   | $\pm$ | 0.16 | 0.68   | $\pm$ | 0.22 | 0.909   |
|           | Principal Gastric Frequency (cpm)  | 0.23   | $\pm$ | 0.18 | -0.01  | $\pm$ | 0.13 | 0.131   |
| $C_{max}$ | BMI-Adjusted Amplitude ( $\mu V$ ) | 55.8   | $\pm$ | 4.5  | 58.0   | $\pm$ | 4.4  | 0.460   |
|           | Gastric Alimetry Rhythm Index      | 0.70   | $\pm$ | 0.04 | 0.73   | $\pm$ | 0.04 | 0.410   |
|           | Principal Gastric Frequency (cpm)  | 3.02   | $\pm$ | 0.05 | 3.05   | $\pm$ | 0.06 | 0.442   |
| $T_{max}$ | BMI-Adjusted Amplitude ( $\mu V$ ) | 1.8    | $\pm$ | 0.4  | 1.2    | $\pm$ | 0.2  | 0.149   |
|           | Gastric Alimetry Rhythm Index      | 2.7    | $\pm$ | 0.4  | 2.1    | $\pm$ | 0.3  | 0.252   |
|           | Principal Gastric Frequency (cpm)  | 2.2    | $\pm$ | 0.4  | 1.4    | $\pm$ | 0.3  | 0.135   |

50 <sup>1</sup> Data presented as mean  $\pm$  SEM; n=19.

51 <sup>2</sup> Significance between gels analysed by Student's paired *t* test.
